# Supplementary material for: Intensification of terrestrial carbon cycle related to El Niño–Southern Oscillation under greenhouse warming
Source: PubMed Central journal article supplement (PMC5698330; doi:10.1038/s41467-017-01831-7), 2017-11-22
Supplement: 41467_2017_1831_MOESM2_ESM.pdf [file 41467_2017_1831_MOESM2_ESM.pdf]

**Supplementary Table 1 | CMIP5 ESMs used in this study**

| Model Name   | Modeling Center (or Group)                                                                                                                                                |
|--------------|---------------------------------------------------------------------------------------------------------------------------------------------------------------------------|
| CESM1-CAM5   | Community Earth System Model Contributors                                                                                                                                 |
| CanESM2      | Canadian Centre for Climate Modelling and Analysis                                                                                                                        |
| GISS-E2-H    | NASA Goddard Institute for Space Studies                                                                                                                                  |
| HadGEM2-ES   | Met Office Hadley Centre                                                                                                                                                  |
| IPSL-CM5A-MR | Institute Pierre Simon Laplace                                                                                                                                            |
| MIROC-ESM    | Japan Agency for Marine-Earth Science and Technology, Atmosphere and Ocean Research Institute (The University of Tokyo), and National Institute for Environmental Studies |
| MPI-ESM-LR   | Max Planck Institute for Meteorology                                                                                                                                      |
| NorESM1-M    | Norwegian Climate Centre                                                                                                                                                  |
| bcc-csm1-1   | Beijing Climate Center,<br>China Meteorological Administration                                                                                                            |

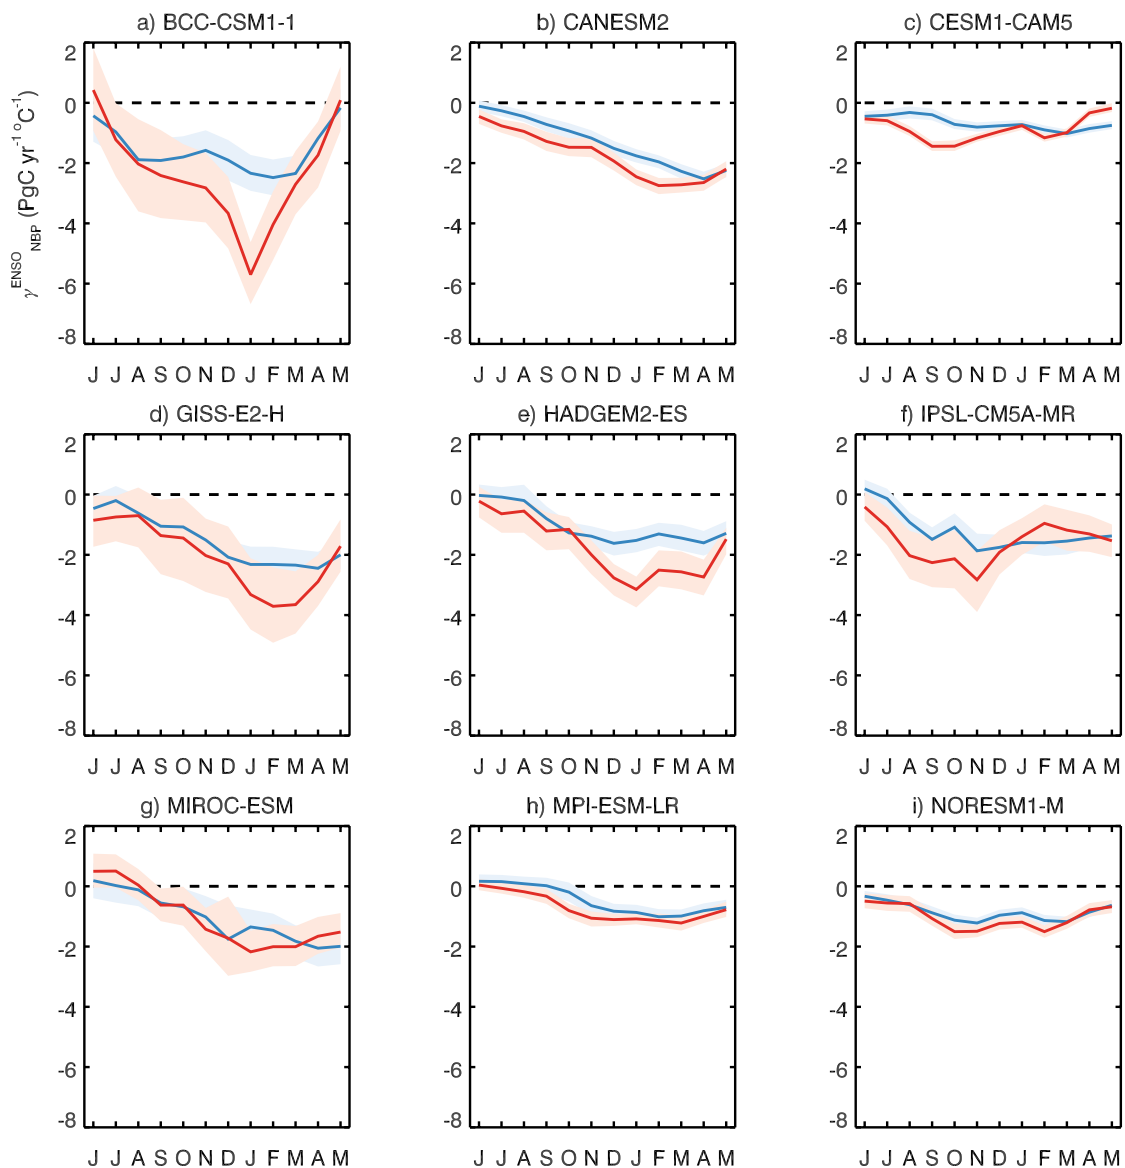

**Supplementary Figure 1 | Net biome production sensitivities to ENSO in individual models.** Regression coefficients of carbon flux anomalies in 40°S–40°N on the December–February Niño3.4 index for net biome production based on the pre-industrial experiment (blue) and ECP4.5 (red). Shaded area indicates 95% confidence levels calculated using bootstrap method.

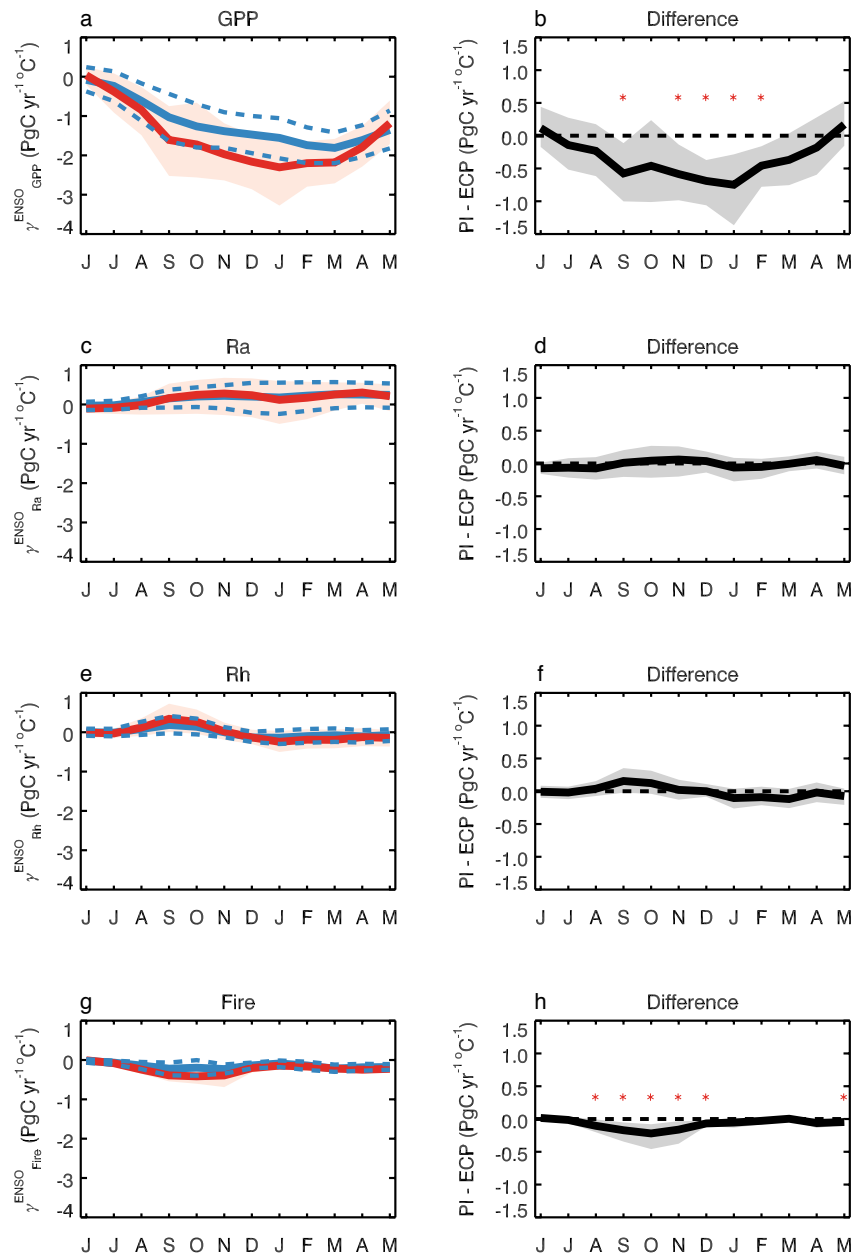

**Supplementary Figure 2 | Terrestrial carbon flux sensitivities to ENSO.** Regression coefficient of carbon flux anomalies in 40°S–40°N on the December–February Niño3.4 index for **(a)** gross primary production, **(c)** autotrophic respiration **(e)** heterotrophic respiration and **(g)** fire in the pre-industrial experiment (blue) and ECP4.5 (red) and the **(b, d, f, h)** difference between two experiments for multi-model ensemble (thick line) and 95% confidence level (shaded) based on bootstrap estimates.

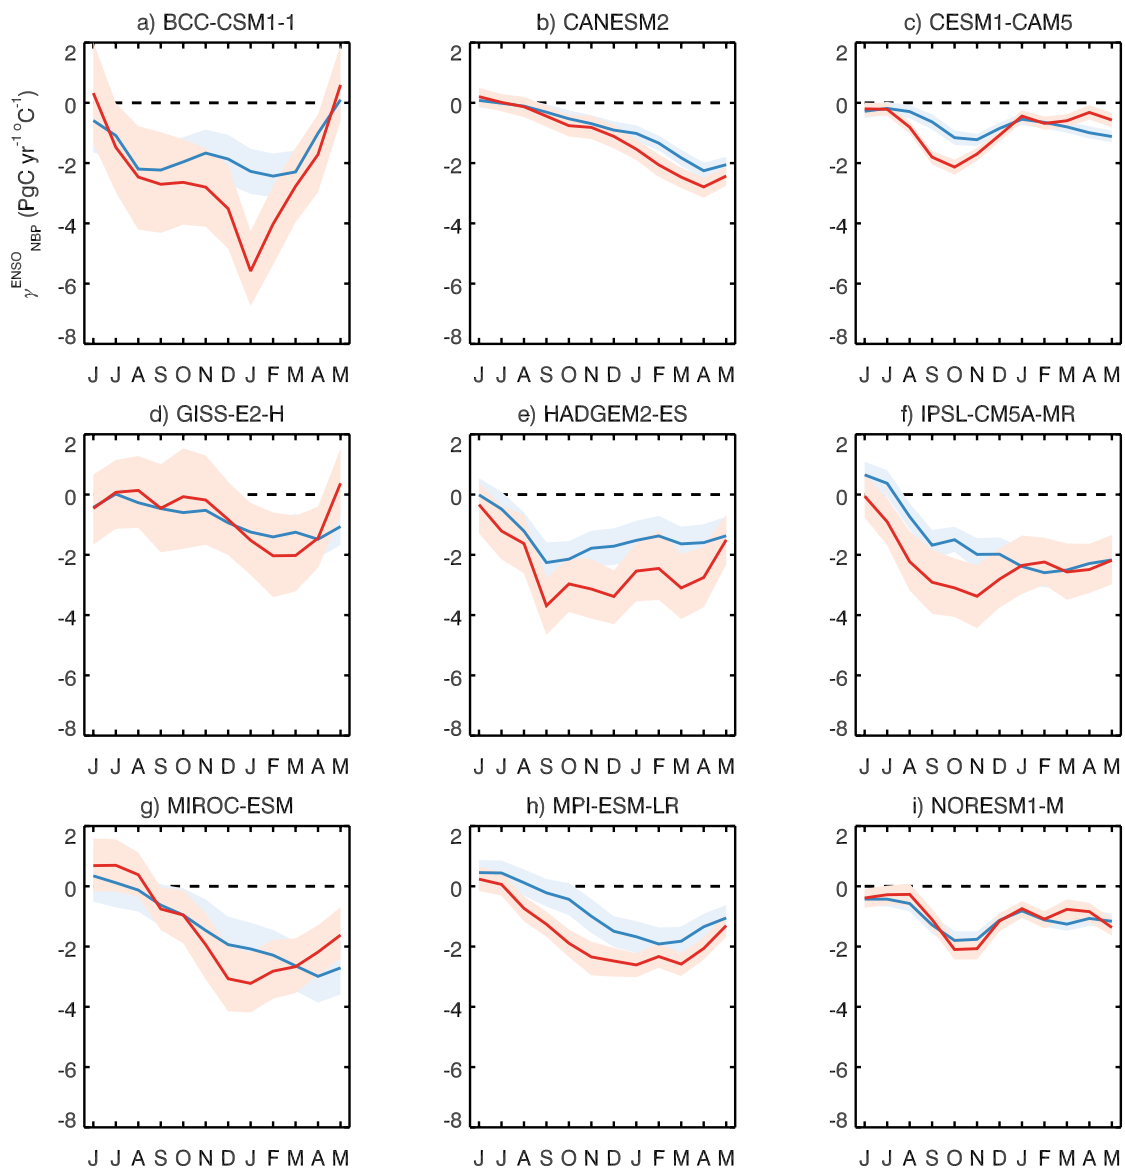

**Supplementary Figure 3 | Gross primary production sensitivities to ENSO in individual models.** Regression coefficients of carbon flux anomalies in 40°S–40°N on the December–February Niño3.4 index for gross primary production based on the pre-industrial experiment (blue) and ECP4.5 (red). Shaded area indicates 95% confidence levels calculated using bootstrap method.

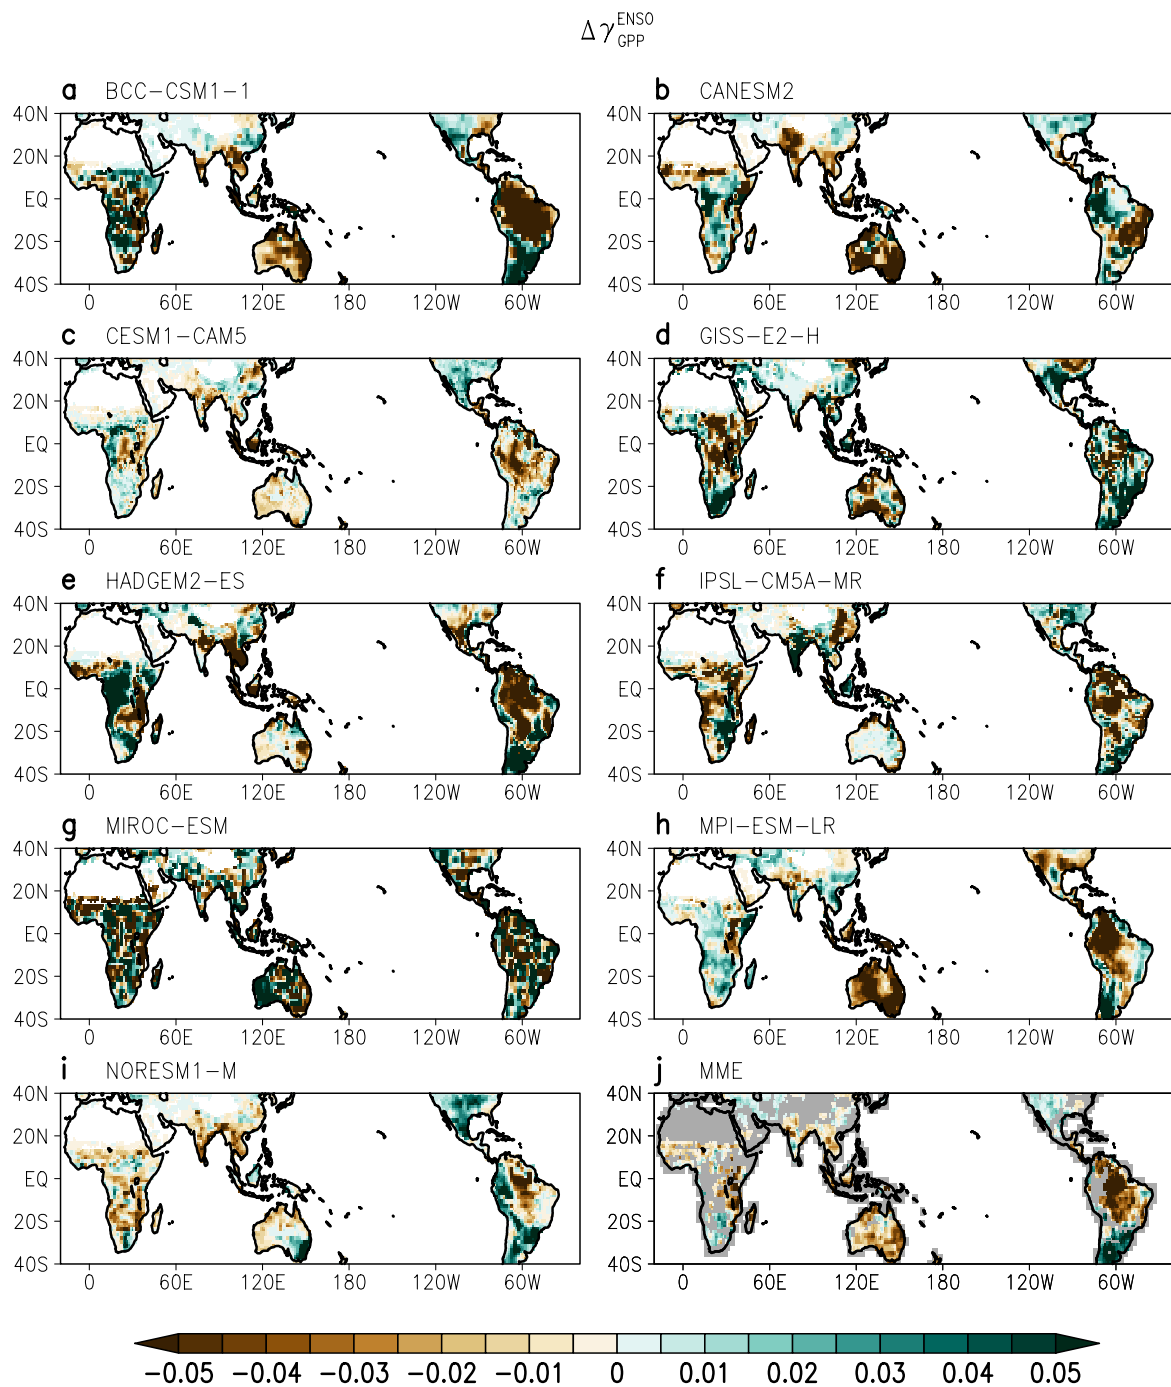

**Supplementary Figure 4 | Changes in gross primary production response to ENSO**

( $\Delta\gamma_{GPP}^{ENSO}$ ). (a–i) Differences in the regression coefficient of gross primary production (GPP) anomalies during September to the following February on the DJF Niño3.4 index between the pre-industrial experiment and ECP4.5 for individual models. (j) Multi-model ensemble result

for changes in GPP response to ENSO. Gray area indicates non-significant region at 95% confidence level calculated using bootstrap method.

$$\Delta \gamma_{GPP}^{Temp} \times \gamma_{Temp}^{ENSO}$$

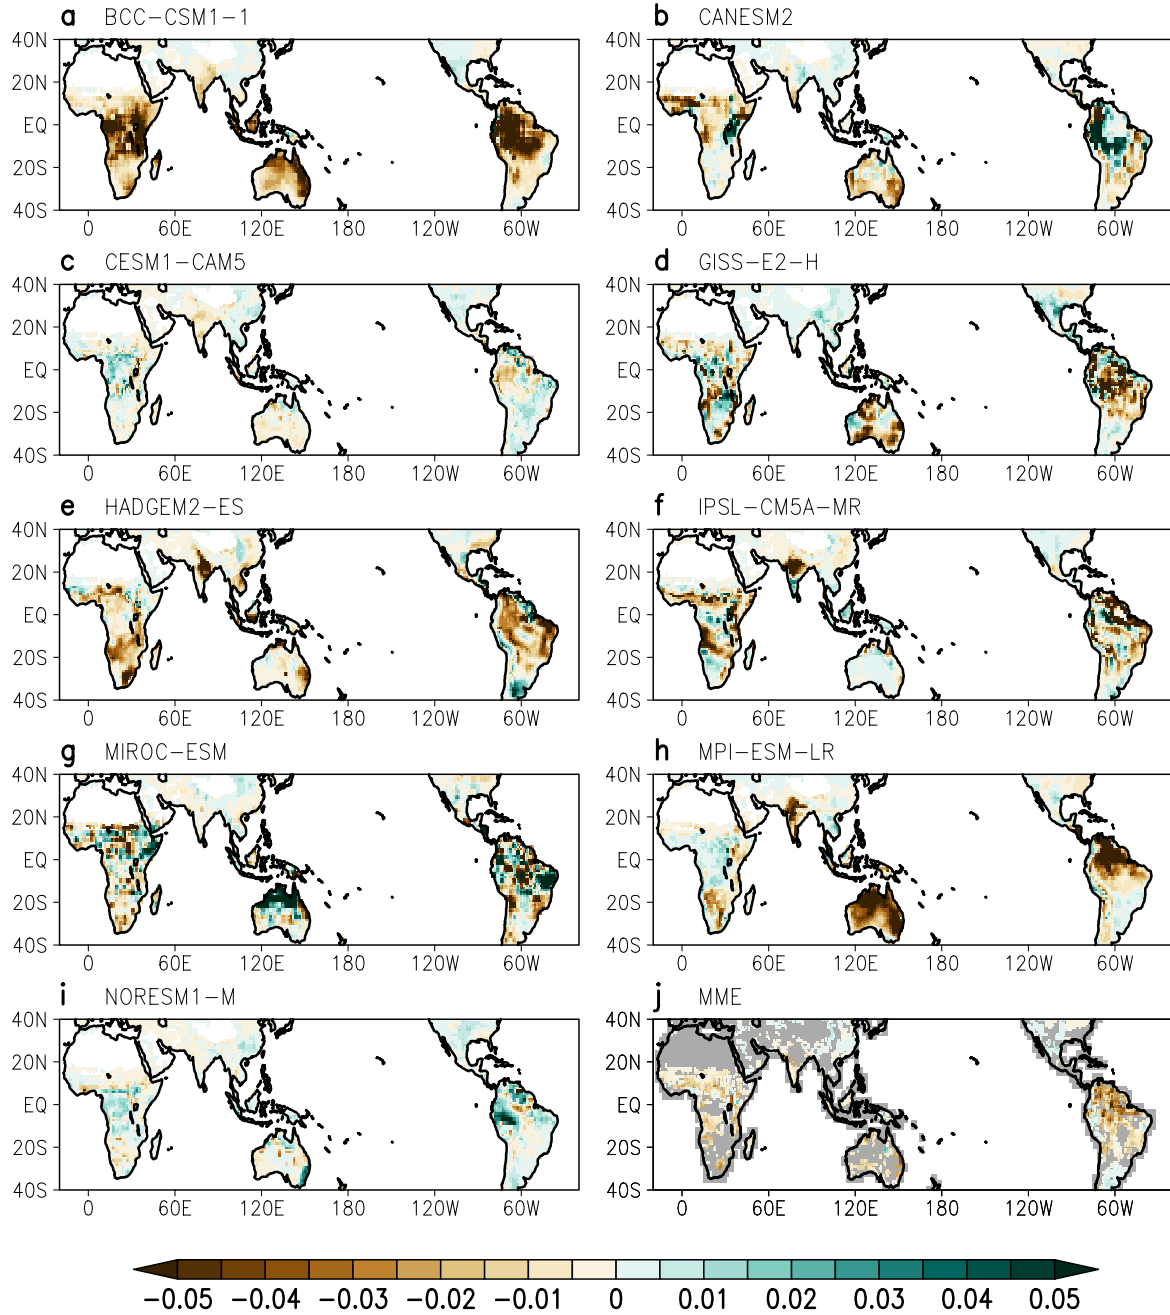

**Supplementary Figure 5 | Contribution of the changes in the gross primary production**

**sensitivity to temperature ( $\Delta \gamma_{GPP}^{Temp} \gamma_{Temp}^{ENSO}$ ) (a–i)  $\Delta \gamma_{GPP}^{Temp} \gamma_{Temp}^{ENSO}$  for individual models. (j)**

Multi-model ensemble result for  $\Delta \gamma_{GPP}^{Temp} \gamma_{Temp}^{ENSO}$ . Gray area indicates non-significant region at 95% confidence level calculated using bootstrap method.

$$\Delta\gamma_{Temp}^{ENSO} \times \gamma_{GPP}^{Temp}$$

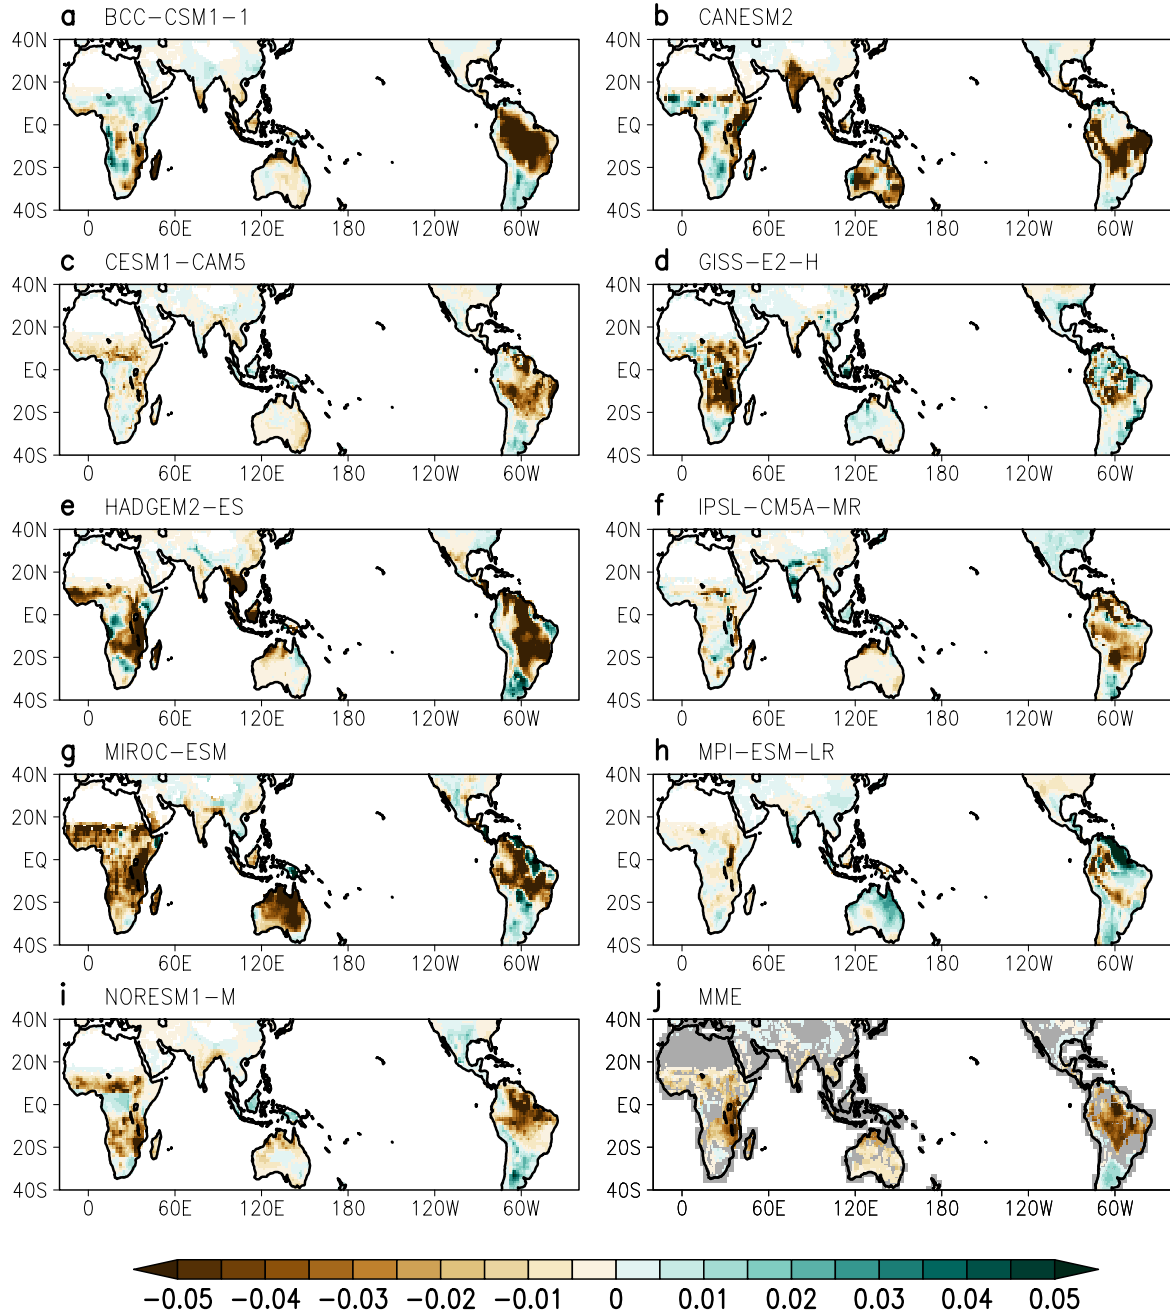

**Supplementary Figure 6 | Contribution of the changes in the temperature response to ENSO ( $\Delta\gamma_{Temp}^{ENSO} \gamma_{GPP}^{Temp}$ ) (a-i)  $\Delta\gamma_{Temp}^{ENSO} \gamma_{GPP}^{Temp}$  for individual models. (j) Multi-model ensemble result for  $\Delta\gamma_{Temp}^{ENSO} \gamma_{GPP}^{Temp}$ . Gray area indicates non-significant region at 95% confidence level calculated using bootstrap method.**



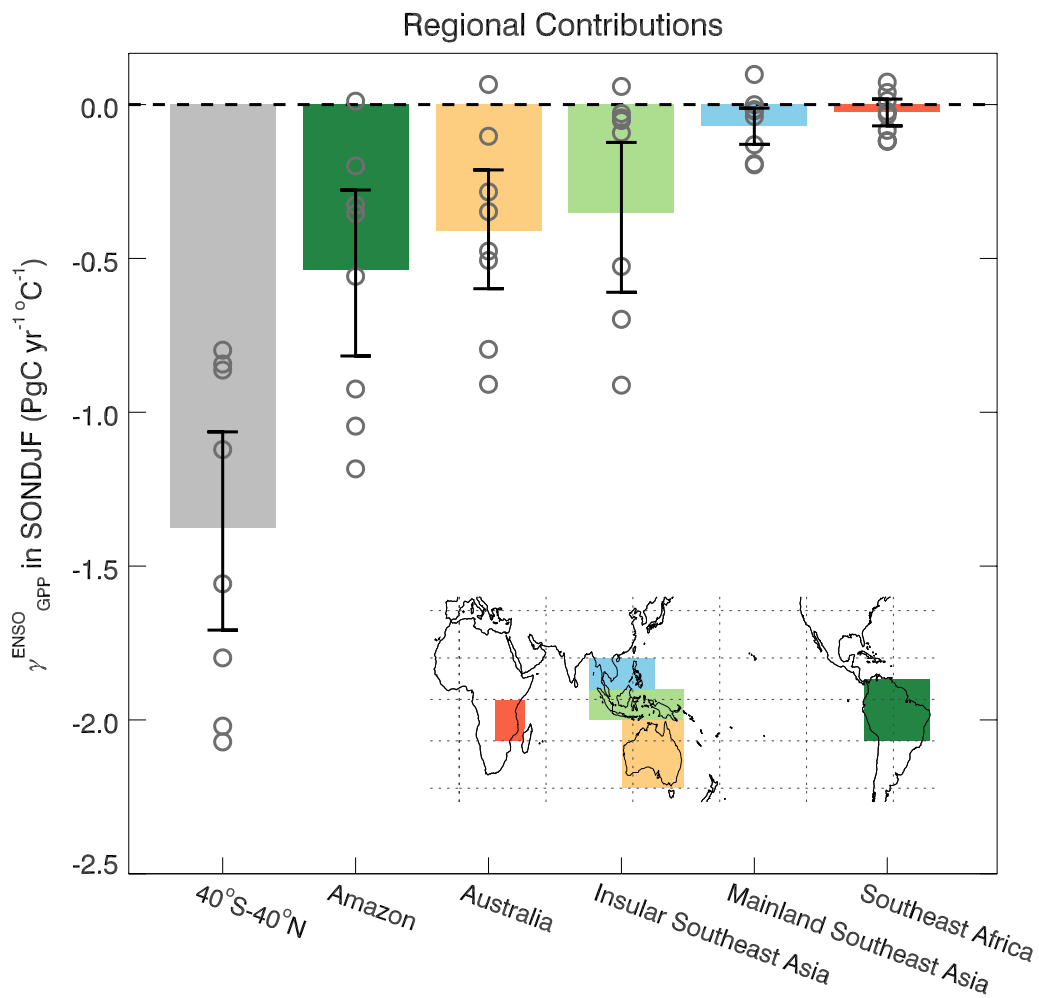

**Supplementary Figure 7 | Regional contributions to the gross primary production response to ENSO.** Regression coefficient of regional gross primary production anomalies during September to the following February on December–February Niño3.4 index in the pre-industrial experiment. Each bar shows the Multi-model ensemble results based on each region, as marked on the map. Open circles denote individual Earth System Model results. Error bars indicate 95% confidence levels based on bootstrap estimation.

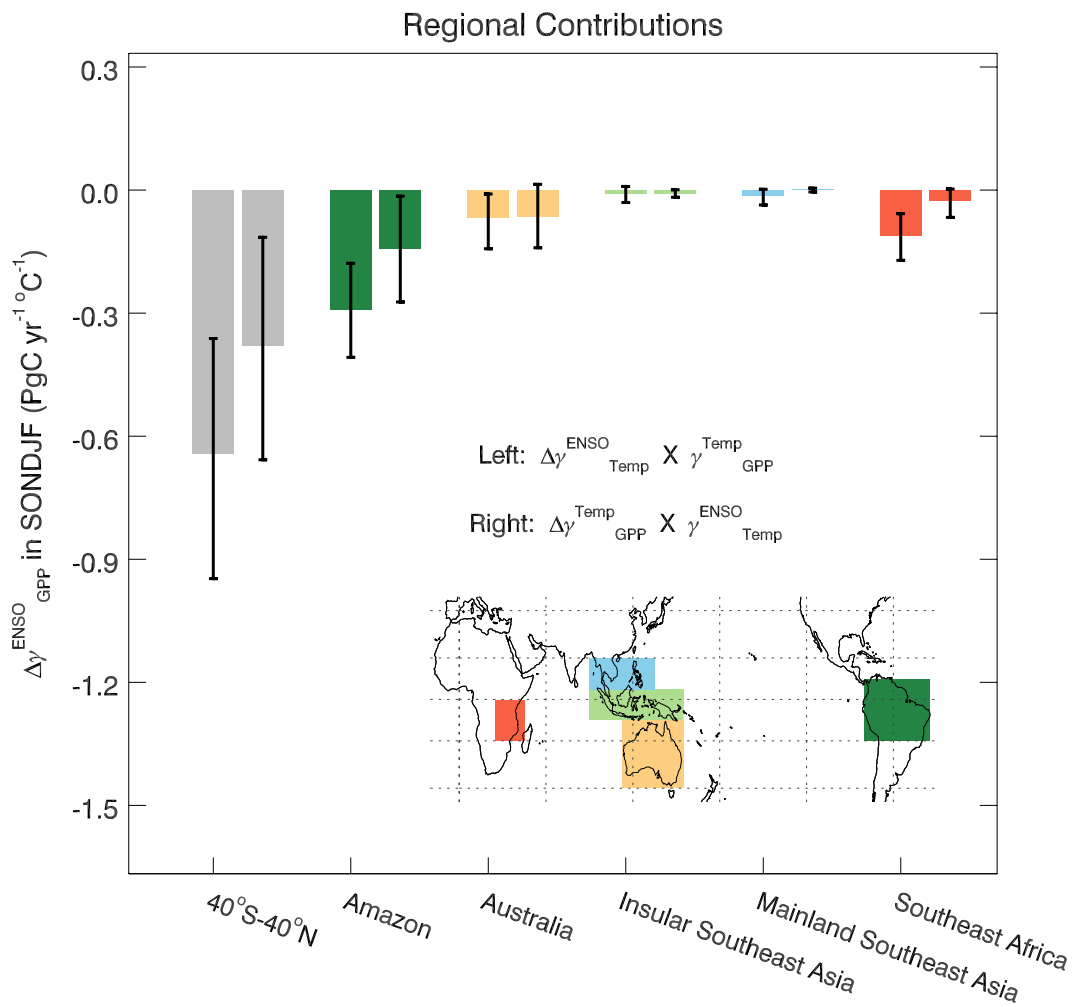

**Supplementary Figure 8 | Regional contribution in Fig 2c,e.** Regional contribution of the changes the surface temperature response to ENSO ( $\Delta\gamma_{Temp}^{ENSO} \gamma_{GPP}^{Temp}$ ; left bars) and gross primary production sensitivity to temperature ( $\Delta\gamma_{GPP}^{Temp} \gamma_{Temp}^{ENSO}$ ; right bars). Each bar shows the multi-model ensemble results based on each region, as marked on the map. Error bars indicate 95% confidence levels based on bootstrap estimation.

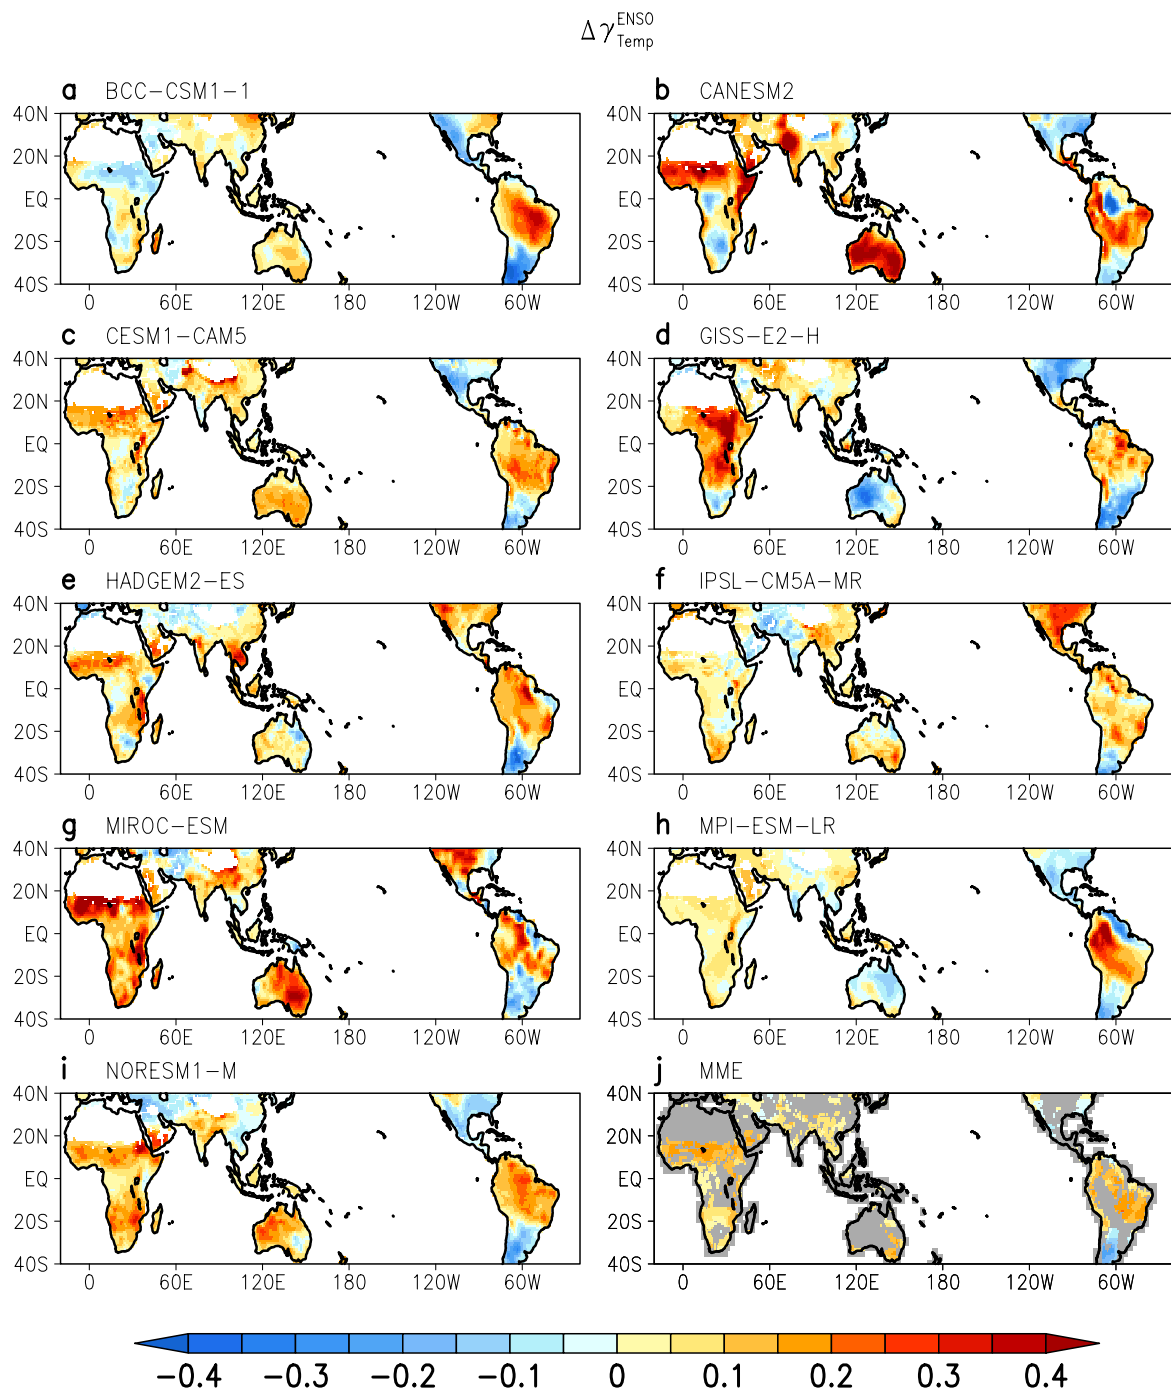

**Supplementary Figure 9 | Future changes of temperature sensitivities to ENSO**

( $\Delta\gamma_{Temp}^{ENSO}$ ). (a–i) Regression coefficient differences of the local surface temperature anomalies during September to the following February on the December–February Niño3.4 index between the pre-industrial experiment and ECP4.5 for individual models. (j) Multi-model

ensemble result for  $\Delta\gamma_{\text{Temp}}^{\text{ENSO}}$ . Gray area indicates non-significant region at 95% confidence level calculated using bootstrap method.

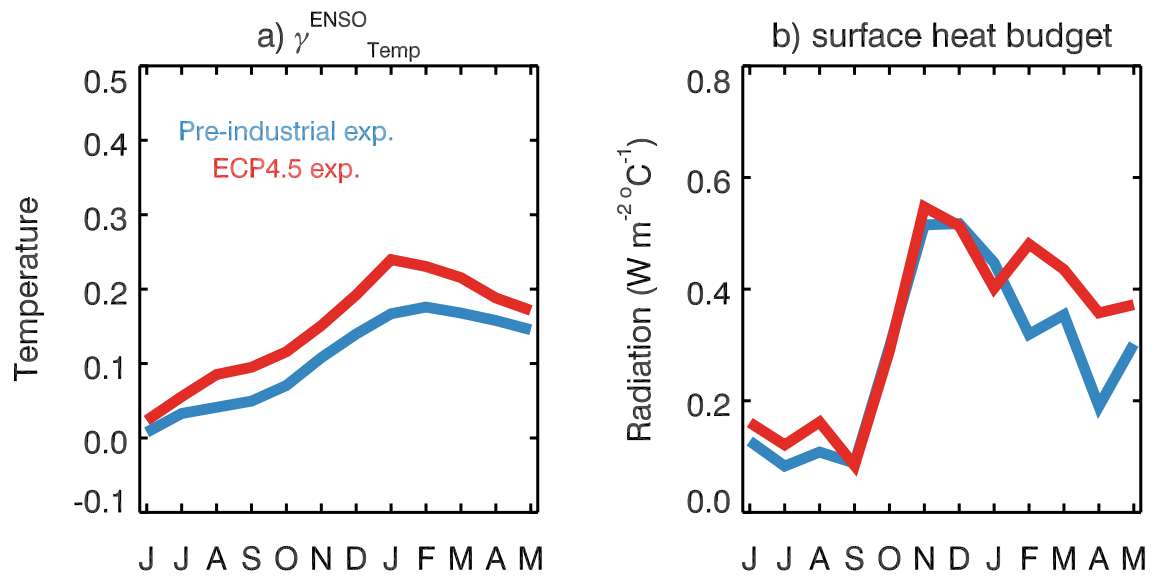

**Supplementary Figure 10 |  $\gamma_{Temp}^{ENSO}$  and total summation of radiation in 40°S–40°N. (a)**

Multi-model ensemble  $\gamma_{Temp}^{ENSO}$  for pre-industrial (blue) and ECP4.5 (red) scenario. (b) total summation of radiation that downward/upward long/short wave radiation and sensible/latent heat in the pre-industrial experiment and ECP4.5 ( $W m^{-2} °C^{-1}$ ).

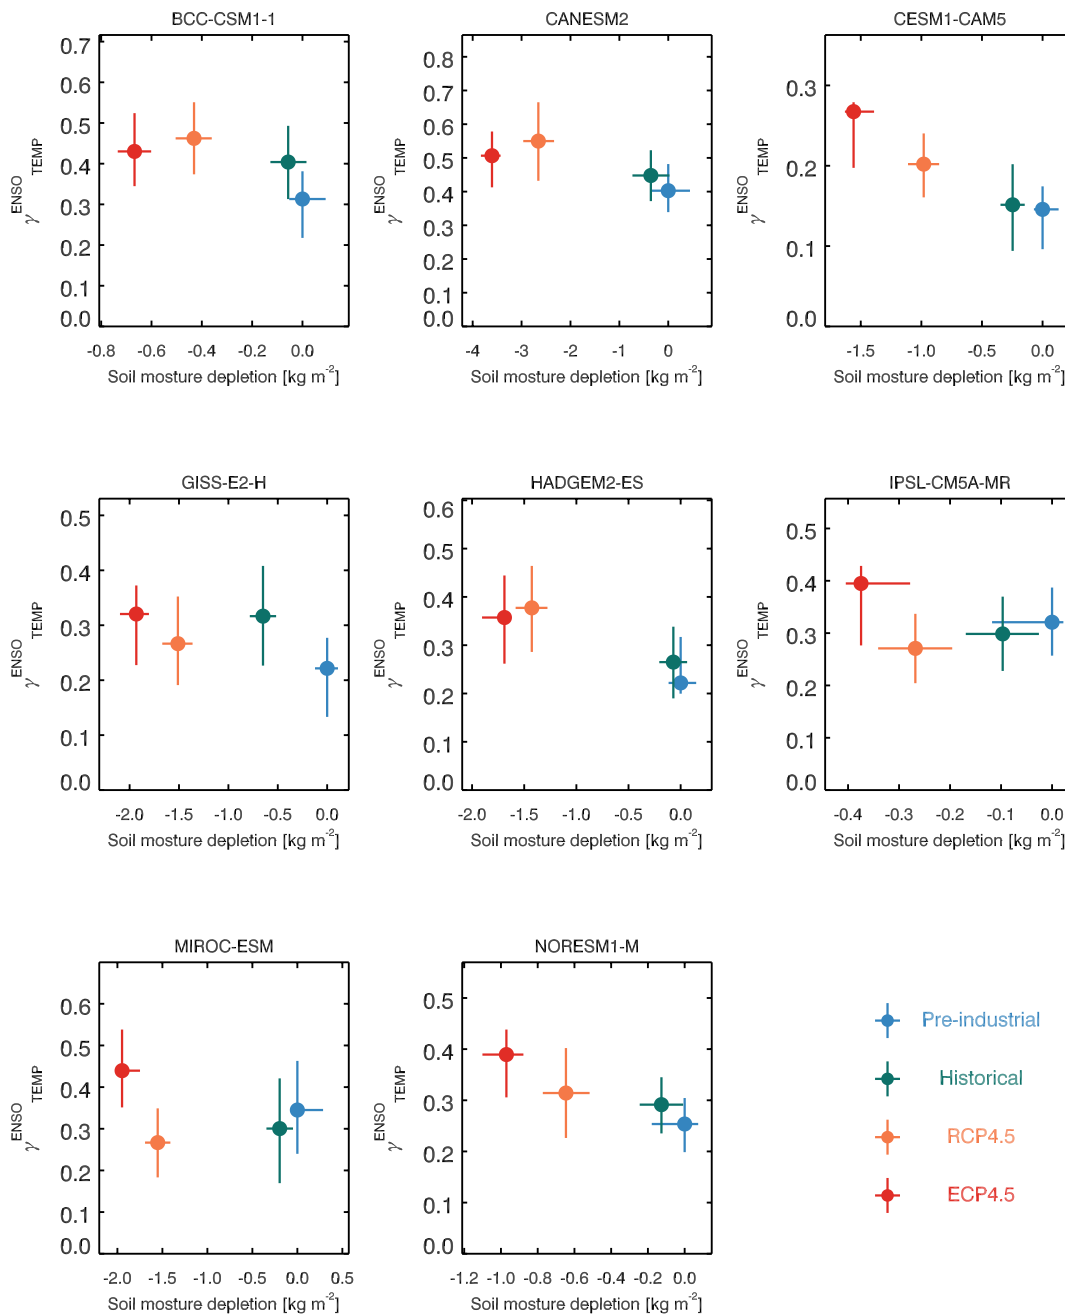

**Supplementary Figure 11 | Soil moisture depletion and surface temperature anomalies**

**related to ENSO in Amazonia.** Mean soil moisture depletion during September to the following February (SONDJF) in Amazonia (100°–165°W, 20°S–10°N) for pre-industrial (blue), historical (green), RCP4.5 (orange) and ECP4.5 (red) and sensitivity of SONDJF mean surface temperature in Amazonia to ENSO ( $\gamma_{TEMP}^{ENSO}$ ) based on the linear regression against December–February Niño3.4 index. Lines indicates 95% confidence levels calculated using bootstrap method.
